# Supplementary material for: Population Response to Air Pollution and the Risk of Coronavirus Disease in Chinese Cities during the Early Pandemic Period
Source: Int J Environ Res Public Health. 2021 Feb 24;18(5):2248. doi: 10.3390/ijerph18052248 (PMC7967675; doi:10.3390/ijerph18052248)
Supplement: Supplementary file 1 [file ijerph-18-02248-s001.xlsx]

## Sheet: Sheet1
state	city	cumulative cases	Attack rate (person / 100,000)	Percentile of Attaack rate	Mean PM2.5(AQI)	Percentile of Mean PM2.5	Percentile of Mean PM10	Percentile of Mean PM10	Mean NO2(AQI)	Percentile of Mean NO2	Mean SO2(AQI)	Percentile of Mean SO2	Mean O3(AQI)	Percentile of Mean O3	Mean Temperature(℃)	Population	Population density (person / ㎢)	Distance from Wuhan(KM)	Number of high speed rail lane
Anhui	Anqing	56	1.25205	87.4214	135	41.5094	66.8831	33.7662	13	29.2208	2.9375	24.6753	31.8125	79.4326	3.04167	4472667	390	267	0
Anhui	Bengbu	48	1.51684	90.566	150.312	57.2327	29.8701	70.7792	19.1875	57.1429	5.6875	62.987	24.375	49.6454	3.04167	3164467	530	393	0
Anhui	Chizhou	11	0.784304	69.1824	129.75	36.478	54.5455	46.1039	14.3125	38.3117	3.5	39.6104	19.375	20.5674	3.04167	1402518	160	308	0
Anhui	Fuyang	84	1.10528	81.761	177.625	75.4717	23.3766	77.2727	14.5625	40.2597	2.0625	9.74026	21.625	30.4965	3.04167	7599913	780	297	0
Anhui	Hefei	93	1.24715	86.7925	141.062	45.9119	60.3896	40.2597	21.75	71.4286	3.125	29.8701	19.6875	22.695	3.04167	7457027	693	320	1
Anhui	Huaibei	14	0.662165	61.6352	192.5	86.1635	16.8831	83.7662	21.5625	70.1299	5.3125	61.039	25.9375	61.7021	3.04167	2114276	770	446	0
Anhui	Huainan	12	0.514162	42.7673	179.188	76.1006	28.5714	72.0779	17.875	52.5974	5.25	59.0909	22.5625	36.8794	3.04167	2333896	420	345	0
Anhui	Lu'an	34	0.605877	54.717	151.5	59.1195	35.0649	65.5844	16.5	48.0519	2.375	14.9351	29.125	73.7589	3.04167	5611701	310	247	0
Anhui	Maanshan	30	1.36184	88.6792	153.562	62.2642	45.4545	55.1948	24.0625	79.8701	7.0625	71.4286	23.5	40.4255	4.05469	2202899	550	431	0
Anhui	Tongling	19	1.21587	86.1635	144.125	47.7987	40.9091	59.7403	21.9375	72.0779	11.3125	88.3117	45.375	99.2908	3.04167	1562670	570	378	0
Anhui	Wuhu	23	0.648789	59.7484	148.062	54.717	57.1429	43.5065	20.6875	66.2338	4.6	55.8442	18.875	17.0213	4.05469	3545067	610	401	0
Beijing	Beijing	232	1.0677	80.5031	101.938	18.8679	75.974	24.6753	19.6875	60.3896	3.25	33.1169	21.375	27.6596	-2.35202	21729000	1300	1056	3
Chongqing	Chongqing	376	1.16229	84.2767	133.562	40.2516	53.2468	47.4026	23.5	77.9221	5.3125	61.039	13.0625	2.83688	8.76562	32350000	370	752	1
Fujian	Fuzhou	55	0.772975	67.9245	100.812	16.3522	91.5584	9.09091	10.8125	18.8312	1.6875	5.19481	37.625	93.617	13.4219	7115369	551	705	1
Fujian	Nanping	12	0.453592	37.7358	82.375	5.66038	98.0519	2.5974	8.25	12.3377	2.9375	24.6753	36.9375	92.9078	13.4219	2645548	100	581	0
Fujian	Ningde	14	0.496103	41.5094	102.125	20.1258	87.013	13.6364	9.5	14.9351	3.5	39.6104	42.75	97.8723	13.4219	2821996	210	674	1
Fujian	Putian	38	1.36764	89.3082	101.5	17.6101	96.1039	4.54545	6.8125	6.49351	2	7.79221	35.2	89.3617	13.4219	2778508	670	738	1
Fujian	Quanzhou	37	0.455187	38.9937	110.688	23.8994	84.4156	16.2338	12.875	28.5714	2.8125	20.7792	44	98.5816	15.9141	8128533	770	761	1
Fujian	Sanming	11	0.439405	35.2201	88.4375	6.28931	88.3117	12.3377	12.8125	27.9221	5.875	66.8831	29.9375	76.5957	13.4219	2503388	110	583	0
Fujian	Xiamen	21	0.594674	53.4591	79.1875	4.40252	94.1558	6.49351	8.9375	14.2857	2.9375	24.6753	47.8125	100	15.9141	3531347	1553	777	1
Fujian	Zhangzhou	15	0.311851	20.7547	96.25	11.3208	51.2987	49.3506	11.8125	22.0779	2.875	24.026	35.625	91.4894	15.9141	4809983	370	754	1
Gansu	Lanzhou	30	0.829609	71.6981	140.812	45.283	37.013	63.6364	29.4375	92.8571	11.125	87.6623	29.875	75.8865	-7.38542	3616163	270	1148	0
Gansu	Tianshui	10	0.306509	18.239	146.125	50.9434	43.5065	57.1429	19.5	59.0909	9.4375	79.8701	23.625	42.5532	8.76562	3262548	230	918	0
Guangdong	Dongguan	44	0.535266	45.9119	120.125	28.3019	79.2208	21.4286	19.75	61.039	5	58.4416	41	96.4539	17.2934	8220207	3300	840	0
Guangdong	Foshan	50	0.694696	64.1509	90.5	6.91824	78.5714	22.0779	20.8125	67.5325	3.6875	44.8052	25.875	60.9929	17.2934	7197394	1900	849	0
Guangdong	Guangzhou	249	1.96033	94.3396	92.25	8.1761	72.7273	27.2727	23.3125	77.2727	3.1875	31.1688	27.8125	69.5035	17.2934	12701948	2000	837	1
Guangdong	Huizhou	34	0.739387	66.0377	96.5	11.9497	82.4675	18.1818	8.5625	12.987	2.1875	12.3377	NA	NA	19.1536	4598402	420	835	1
Guangdong	Meizhou	10	0.235935	10.0629	92.5625	8.80503	87.6623	12.987	13.9375	35.7143	4.5625	54.5455	33.1875	85.8156	17.151	4238461	270	723	0
Guangdong	Qingyuan	10	0.270386	13.8365	224.562	97.4843	74.026	26.6234	17.4375	51.2987	3	26.6234	25.5	57.4468	17.2934	3698412	190	776	1
Guangdong	Shantou	20	0.371104	27.044	98.75	13.8365	90.9091	9.74026	10.5625	16.2338	3.9375	48.7013	40.0625	94.3262	17.151	5389328	2400	839	0
Guangdong	Shenzhen	291	2.80932	97.4843	110.312	22.6415	70.1299	30.5195	7.6875	10.3896	2.0625	9.74026	31.75	78.7234	19.1536	10358381	6100	895	2
Guangdong	Yangjiang	12	0.49551	40.8805	98.8125	14.4654	85.7143	14.9351	7.1875	8.44156	3.6875	44.8052	40.0625	94.3262	17.2934	2421748	300	999	0
Guangdong	Zhanjiang	18	0.257333	11.9497	101.75	18.239	86.3636	14.2857	4.25	1.94805	3.46667	38.961	42.375	97.1631	21.3333	6994832	560	1107	0
Guangdong	Zhaoqing	13	0.331932	22.6415	107.062	21.3836	92.2078	8.44156	14.3125	38.3117	2.5	16.2338	NA	NA	17.2934	3916467	260	857	0
Guangdong	Zhongshan	36	1.15337	83.6478	98	13.2075	77.2727	23.3766	20.25	63.6364	2.8125	20.7792	35.8125	92.1986	18.8449	3121275	1800	902	0
Guangdong	Zhuhai	72	4.60791	99.3711	97.625	12.5786	92.8571	7.79221	12.5	25.974	1.3125	2.5974	35.4375	90.7801	18.8449	1562530	910	927	0
Guangxi	Beiahai	29	1.88403	93.7107	121	30.8176	NA	NA	NA	NA	NA	NA	NA	NA	15.7995	1539251	460	1137	0
Guangxi	Fangchenggang	13	1.49955	89.9371	80.25	5.03145	83.7662	16.8831	12.4375	25.3247	3.33333	35.7143	19.8125	24.1135	15.7995	866927	140	1152	0
Guangxi	Guilin	26	0.547603	48.4277	103.938	20.7547	96.7532	3.8961	4.75	3.24675	3.0625	27.9221	25	53.9007	9.14062	4747963	170	708	0
Guangxi	Liuzhou	17	0.452284	37.1069	111.562	24.5283	72.7273	27.2727	14.4375	39.6104	11.75	89.6104	26.375	63.1206	9.14062	3758704	200	848	0
Guangxi	Nanning	28	0.4205	32.7044	99	15.0943	85.0649	15.5844	10.75	17.5325	4.4375	53.2468	21.6875	31.2057	15.7995	6658742	330	1047	0
Guizhou	Guiyang	12	0.277485	14.4654	95.75	10.6918	97.4026	3.24675	5.8125	4.54545	4.125	50	19.625	21.9858	6.49479	4324561	580	862	1
Hainan	Haikou	16	0.781941	68.5535	66.5625	2.51572	98.7013	1.94805	4.375	2.5974	1.125	1.94805	40.5	95.7447	21.3333	2046189	910	1237	0
Hainan	Sanya	22	3.20977	98.1132	56.4375	0.628931	99.3506	1.2987	3.125	1.2987	2.125	11.6883	33.9375	87.234	24.0026	685408	360	1456	0
Hebei	Baoding	17	0.169505	2.51572	197.812	87.4214	5.19481	95.4545	34.25	98.7013	9.9375	82.4675	18.9375	18.4397	-3.0651	10029197	506	927	1
Hebei	Cangzhou	20	0.280346	15.0943	174.438	72.956	15.5844	85.0649	26.125	86.3636	9.9375	82.4675	23.5625	41.1348	-1.21382	7134053	500	893	0
Hebei	Handan	14	0.152594	1.25786	220.062	96.2264	0.649351	100	29.625	93.5065	9.25	79.2208	18.5625	13.4752	-3.0651	9174679	780	670	1
Hebei	Langfang	13	0.298245	16.3522	126.5	33.9623	33.1169	67.5325	26	85.0649	4.8125	57.7922	22	33.3333	-2.35202	4358839	680	1018	1
Hebei	Shijiazhuang	21	0.219944	6.91824	230.438	98.1132	1.94805	98.7013	34.5	99.3506	6.9375	70.7792	9.9375	0.70922	-3.0651	9547869	700	830	2
Hebei	Tangshan	12	0.158368	1.88679	176.938	74.2138	7.79221	92.8571	33.9375	98.0519	16.625	96.7532	19.0625	19.1489	-1.21382	7577284	560	1068	1
Hebei	Xingtai	16	0.225222	8.1761	222.5	96.8553	1.2987	99.3506	31.625	97.4026	10.8125	87.013	17.4375	10.6383	-3.0651	7104114	558	722	1
Hebei	Zhangjiakou	10	0.230124	8.80503	90.875	7.54717	89.6104	10.3896	11.375	20.1299	14.25	92.8571	30.75	78.0142	-2.35202	4345491	130	1140	0
Heilongjiang	Daqing	11	0.378718	28.3019	209.75	92.4528	9.09091	91.5584	25.375	82.4675	16.0625	96.1039	32.9375	84.3972	-18.099	2904532	130	2007	0
Heilongjiang	Harbin	73	0.68635	62.8931	235.5	99.3711	5.84416	94.8052	29.6667	94.1558	25.2	99.3506	24	46.8085	-18.099	10635971	200	2001	1
Heilongjiang	Jiamusi	11	0.431018	34.5912	176.438	73.5849	50	50.6494	6.625	5.84416	6.0625	67.5325	33.25	86.5248	-18.099	2552097	74	2276	0
Heilongjiang	Jixi	12	0.644413	58.4906	142.375	47.1698	65.5844	35.0649	13.6875	33.1169	5.75	64.9351	28	70.922	-18.099	1862161	83	2190	0
Heilongjiang	Qiqihar	20	0.372647	27.673	180.25	76.7296	26.6234	74.026	17.75	51.9481	21.5625	98.7013	21.375	27.6596	-18.099	5367003	130	2042	0
Heilongjiang	Shuangyashan	16	1.09392	81.1321	164.188	67.9245	38.3117	62.3377	13.25	30.5195	10.625	85.7143	28.6875	72.3404	-18.099	1462626	57	2303	0
Heilongjiang	Suihua	24	0.443096	35.8491	231.312	98.7421	33.7662	66.8831	8.1875	11.039	9.6875	81.1688	26.8125	65.9574	-18.099	5416439	150	2097	0
Henan	Anyang	35	0.676612	62.2642	244.312	100	3.24675	97.4026	26	85.0649	6.1875	68.1818	18.6875	14.1844	1.77344	5172834	700	614	0
Henan	Hebi	10	0.637308	57.2327	214.062	94.3396	8.44156	92.2078	26.4375	87.013	7.5	75.3247	17.9375	12.0567	1.77344	1569100	650	592	1
Henan	Jiaozuo	15	0.423746	33.3333	186.625	81.761	9.74026	90.9091	22.0625	72.7273	7.125	72.7273	18.75	15.6028	1.77344	3539860	877	527	0
Henan	Kaifeng	17	0.363546	25.1572	196.375	86.7925	19.4805	81.1688	19.4375	58.4416	5.6875	62.987	24.125	47.5177	1.77344	4676159	750	468	0
Henan	Luohe	24	0.943358	75.4717	202.188	88.6792	18.1818	82.4675	17.1875	50	3.875	46.1039	20.6875	26.2411	1.77344	2544103	970	333	0
Henan	Luoyang	17	0.259562	12.5786	184.25	79.8742	27.2727	73.3766	15.875	46.1039	3.375	36.3636	19.1875	19.8582	1.77344	6549486	430	487	1
Henan	Nanyang	107	1.04258	78.6164	172.562	71.0692	24.6753	75.974	17.25	50.6494	4.6875	56.4935	32.125	81.5603	1.77344	10263006	450	315	0
Henan	Pingdingshan	34	0.69326	63.522	185.062	80.5031	11.039	89.6104	20.9375	68.8312	6.5	70.1299	26.75	64.539	1.77344	4904367	620	363	0
Henan	Shangqiu	61	0.828526	71.0692	173.562	71.6981	NA	NA	NA	NA	NA	NA	NA	NA	1.77344	7362472	690	450	0
Henan	Xinxiang	39	0.638435	57.8616	186.25	81.1321	NA	NA	NA	NA	NA	NA	NA	NA	1.77344	6108683	690	527	0
Henan	Xinyang	138	2.25908	95.5975	161.312	66.6667	NA	NA	NA	NA	NA	NA	NA	NA	3.96615	6108683	320	172	0
Henan	Xu Chang	24	0.557207	49.6855	192.25	85.5346	20.7792	79.8701	18.5625	55.8442	5.25	59.0909	NA	NA	1.77344	4307199	870	385	0
Henan	Zhengzhou	92	1.06648	79.8742	184.125	79.2453	24.026	76.6234	18.3125	54.5455	3.0625	27.9221	24.375	49.6454	1.77344	8626505	1300	468	2
Henan	Zhoukou	56	0.625477	55.9748	198.75	88.0503	21.4286	79.2208	13.5625	31.8182	3.875	46.1039	22.8125	38.2979	1.77344	8953172	750	341	0
Henan	Zhumadian	82	1.13405	83.0189	174.25	72.327	22.7273	77.9221	15.75	45.4545	2.75	19.4805	24.1875	48.227	1.77344	7230744	480	268	1
Hunan	Changde	56	0.974384	77.3585	145.5	49.0566	48.7013	51.9481	2.75	0.649351	1.8125	5.84416	29.9375	76.5957	5.77083	5747218	310	304	0
Hunan	Changsha	164	2.32818	96.2264	133.062	39.6226	80.5195	20.1299	18.1875	53.8961	1.06667	1.2987	16.8125	8.51064	5.77083	7044118	538	582	2
Hunan	Hengyang	39	0.546107	47.7987	132.375	38.9937	81.1688	19.4805	10.6875	16.8831	3.5625	41.5584	17.125	9.21986	5.77083	7141462	470	442	1
Hunan	Huaihua	35	0.738093	65.4088	117.875	27.673	77.9221	22.7273	7.3125	9.09091	2.5	16.2338	25.625	58.156	9.14062	4741948	180	538	1
Hunan	Loudi	45	1.18871	85.5346	116.188	27.044	61.6883	38.961	13.6875	33.1169	2.6875	18.1818	27.8125	69.5035	5.77083	3785627	470	386	1
Hunan	Shao Yang	68	0.961562	76.1006	128.75	34.5912	71.4286	29.2208	11.4375	20.7792	3.375	36.3636	25	53.9007	5.77083	7071826	340	461	1
Hunan	Xiangtan	23	0.836804	72.327	135.875	42.7673	61.039	39.6104	19	56.4935	4.1875	50.6494	23.625	42.5532	5.77083	2748552	550	332	0
Hunan	Yiyang	40	0.927411	74.8428	154	62.8931	38.961	61.6883	14.25	37.6623	2	7.79221	22.4375	35.461	5.77083	4313084	360	291	0
Hunan	Yongzhou	30	0.579124	52.2013	120.938	30.1887	68.8312	31.8182	12.0625	23.3766	1.8125	5.84416	23.5625	41.1348	9.14062	5180235	230	533	0
Hunan	Yue Yang	89	1.62471	92.4528	153.25	61.6352	46.7532	53.8961	15.875	46.1039	3.625	42.8571	25.4375	56.0284	5.77083	5477911	370	179	0
Hunan	Zhuzhou	38	0.985577	77.9874	138.438	44.6541	70.7792	29.8701	15.4375	43.5065	2.75	19.4805	15.8125	6.38298	5.77083	3855609	340	325	0
Inner Mongolia	Ordos	11	0.56682	50.9434	128.812	35.2201	34.4156	66.2338	23.0625	76.6234	16	95.4545	34.1875	87.9433	-14.2005	1940653	23	1080	0
Jiangsu	Changzhou	24	0.522651	44.0252	146.062	49.6855	39.6104	61.039	23.75	78.5714	4.0625	49.3506	NA	NA	4.05469	4591972	1000	559	2
Jiangsu	Huaian	26	0.541679	46.5409	151.125	57.8616	69.4805	31.1688	15.5	44.1558	8.3125	77.9221	23.4375	39.7163	4.05469	4799889	NA	555	0
Jiangsu	Lianyungang	20	0.455175	38.3648	141.75	46.5409	NA	NA	NA	NA	NA	NA	NA	NA	0.802083	4393914	610	640	0
Jiangsu	Nanjing	47	0.587157	52.8302	147.5	54.0881	40.2597	60.3896	24.8125	81.1688	3.125	29.8701	NA	NA	4.05469	8004680	1237	459	2
Jiangsu	Nantong	25	0.343273	23.8994	146.25	52.2013	62.987	37.6623	14.1875	37.013	3	26.6234	NA	NA	6.71186	7282835	850	649	0
Jiangsu	Suqian	11	0.233271	9.43396	162.562	67.2956	30.5195	70.1299	12.75	27.2727	2.8125	20.7792	NA	NA	4.05469	4715553	638	531	0
Jiangsu	Suzhou	55	0.525511	45.283	150.125	56.6038	49.3506	51.2987	21.3125	69.4805	0.8125	0.649351	NA	NA	6.71186	10465994	1300	612	2
Jiangsu	Taizhou	26	0.562946	50.3145	147.312	53.4591	44.1558	56.4935	11.6875	21.4286	2.8125	20.7792	NA	NA	4.05469	4618558	800	576	0
Jiangsu	Wuxi	26	0.407995	32.0755	146.125	50.9434	42.2078	58.4416	20.4375	64.9351	3.5	39.6104	NA	NA	6.71186	6372624	1400	584	2
Jiangsu	Xuzhou	45	0.524445	44.6541	188.938	84.2767	18.8312	81.8182	22.1875	73.3766	6.375	69.4805	NA	NA	3.04167	8580500	760	487	1
Jiangsu	Yancheng	15	0.206605	5.66038	154.312	63.522	51.9481	48.7013	13.625	32.4675	1.4375	3.24675	NA	NA	4.05469	7260240	430	635	0
Jiangsu	Yangzhou	15	0.336341	23.2704	154.312	63.522	42.8571	57.7922	17.9375	53.2468	3.25	33.1169	NA	NA	4.05469	4459760	670	531	0
Jiangxi	Fuzhou	44	1.12465	82.3899	114.562	26.4151	74.6753	25.974	8.6875	13.6364	3.625	42.8571	21.8125	32.6241	5.77083	3912312	207	355	0
Jiangxi	Ganzhou	48	0.573584	51.5723	93.5	9.43396	76.6234	24.026	12	22.7273	9.875	81.8182	32	80.8511	3.96615	8368440	210	531	0
Jiangxi	Jiujiang	86	1.81866	93.0818	150	55.9748	47.4026	53.2468	16.9375	49.3506	5.5	62.3377	24.875	53.1915	3.96615	4728763	250	190	0
Jiangxi	Nanchang	134	2.65738	96.8553	138.062	44.0252	63.6364	37.013	14.6875	40.9091	3.0625	27.9221	22.25	34.7518	3.96615	5042565	700	263	1
Jiangxi	Pingxiang	22	1.1863	84.9057	146.75	52.8302	48.0519	52.5974	13.75	35.0649	10.25	83.7662	16	7.0922	5.77083	1854510	480	333	1
Jiangxi	Shangrao	69	1.04868	79.2453	101	16.9811	75.3247	25.3247	13.375	31.1688	4.3125	51.2987	19.375	20.5674	13.4219	6579714	290	430	1
Jiangxi	Xinyu	69	6.05862	100	112.938	25.1572	62.3377	38.3117	14.8125	42.2078	8.25	77.2727	24.5	52.4823	5.77083	1138873	360	316	1
Jiangxi	Yichun	48	0.885678	73.5849	120.312	28.9308	66.2338	34.4156	12.3125	24.026	5.6875	62.987	20.5625	24.8227	5.77083	5419575	290	306	1
Jilin	Changchun	28	0.364722	25.7862	184.062	77.9874	46.1039	54.5455	25.625	83.7662	15.1875	94.1558	21.4667	29.7872	-13.7839	7677089	310	1772	1
Liaoning	Dalian	13	0.194307	5.03145	110.5	23.2704	58.4416	42.2078	20.125	62.987	11.4375	88.961	26.75	64.539	-1.85007	6690432	532.09	1144	1
Liaoning	Shenyang	18	0.222053	7.54717	166	68.5535	29.2208	71.4286	30.6875	96.1039	18.3125	97.4026	16.4375	7.80142	-9.80052	8106171	640	1493	1
Ningxia	Yinchuan	20	0.872187	72.956	168.625	69.1824	25.3247	75.3247	25.3125	81.8182	7.0625	71.4286	22.0625	34.0426	-7.38542	2293085	156	1148	0
Qinghai	Xining	14	0.633855	56.6038	158.188	65.4088	36.3636	64.2857	27.1875	88.3117	10.625	85.7143	32.75	82.9787	-7.38542	2208708	300	1338	0
Shaanxi	Ankang	19	0.722459	64.7799	137.688	43.3962	67.5325	33.1169	7.4375	9.74026	2.8125	20.7792	25.625	58.156	0.557292	2629906	128	549	0
Shaanxi	Baoji	10	0.269054	13.2075	204.125	89.3082	13.6364	87.013	25.8125	84.4156	7.25	74.026	26.875	67.3759	0.557292	3716731	200	785	0
Shaanxi	Hanzhong	19	0.556174	49.0566	130.188	37.7358	55.1948	45.4545	5.375	3.8961	3.5625	41.5584	25.4375	56.0284	0.557292	3416196	140	738	0
Shaanxi	Xi'an	70	0.826657	70.4403	207.188	90.566	14.2857	86.3636	29.3125	92.2078	5.8125	65.5844	11.8125	1.41844	0.557292	8467837	827	652	1
Shaanxi	Xianyang	15	0.306446	17.6101	205.875	89.9371	12.3377	88.3117	19.5625	59.7403	4.5	53.8961	17.1875	9.92908	0.557292	4894834	500	669	0
Shandong	Binzhou	11	0.293453	15.7233	171.938	70.4403	17.5325	83.1169	29.6875	94.8052	12.5	90.9091	26.8125	65.9574	-1.21382	3748474	400	830	0
Shandong	Dezhou	24	0.431016	33.9623	207.438	91.195	6.49351	94.1558	22.6875	74.6753	7.6875	75.974	18.6875	14.1844	-3.0651	5568235	540	787	2
Shandong	Heze	12	0.144793	0.628931	211.875	93.7107	2.5974	98.0519	22.6875	74.6753	8.5625	78.5714	25.25	55.3191	1.77344	8287693	680	530	0
Shandong	Jinan	29	0.357472	24.5283	190	84.9057	20.1299	80.5195	28.3125	91.5584	10.4375	85.0649	20.5625	24.8227	-3.0651	8112513	850	723	2
Shandong	Jining	25	0.309333	19.4969	187	82.3899	14.9351	85.7143	28.0625	90.9091	9.5	80.5195	23.9375	46.0993	1.77344	8081905	720	579	0
Shandong	Liaocheng	12	0.207259	6.28931	210.312	93.0818	3.8961	96.7532	29.9375	95.4545	7.1875	73.3766	21.375	27.6596	-3.0651	5789863	660	671	0
Shandong	Linyi	30	0.298821	16.9811	208.188	91.8239	22.0779	78.5714	24.625	80.5195	11.8125	90.2597	27.125	68.0851	0.802083	10039440	580	628	0
Shandong	Qingdao	35	0.401602	30.1887	156.75	64.7799	31.1688	69.4805	20.3125	64.2857	5.8125	65.5844	23.0625	39.0071	0.802083	8715087	820	836	1
Shandong	Rizhao	14	0.499819	42.1384	158.812	66.0377	27.9221	72.7273	23.75	78.5714	7.3125	74.6753	31.9375	80.1418	0.802083	2801013	530	725	0
Shandong	Taian	14	0.254814	11.3208	177.25	74.8428	12.987	87.6623	26.875	87.6623	14.4375	93.5065	27.625	68.7943	0.802083	5494207	710	719	1
Shandong	Weifang	16	0.17609	3.77358	188.438	83.6478	7.14286	93.5065	27.6875	89.6104	13.8125	92.2078	26.25	62.4113	0.802083	9086241	560	816	1
Shandong	Weihai	27	0.962645	76.7296	110.062	22.0126	59.0909	40.9091	12.625	26.6234	3.875	46.1039	32.5625	82.2695	-1.85007	2804771	480	1056	0
Shandong	Yantai	27	0.387474	29.5597	130.5	38.3648	37.6623	62.987	20	62.3377	8.1875	76.6234	32.75	82.9787	-1.85007	6968202	510	1015	0
Shandong	Zaozhuang	17	0.455869	39.6226	187.688	83.0189	25.974	74.6753	19.875	61.6883	10.3125	84.4156	23.75	43.9716	0.802083	3729140	820	567	1
Shandong	Zibo	14	0.30901	18.8679	184.062	77.9874	10.3896	90.2597	31.375	96.7532	19.5	98.0519	29.0625	73.0496	0.802083	4530597	760	775	1
Shanghai	Shanghai	157	0.648841	60.3774	135.562	42.1384	55.8442	44.8052	20.4375	64.9351	3.375	36.3636	26.6875	63.8298	6.71186	24197000	3800	690	3
Shanxi	Jinzhong	21	0.646268	59.1195	180.25	76.7296	16.2338	84.4156	27.6875	89.6104	25.4375	100	22.6875	37.5887	-4.19166	3249425	200	1169	0
Shanxi	Yuncheng	17	0.331075	21.3836	219.062	95.5975	4.54545	96.1039	20.75	66.8831	13.4375	91.5584	29.1875	74.4681	0.557292	5134794	360	581	0
Sichuan	Bazhong	15	0.456792	40.2516	123.5	32.7044	57.7922	42.8571	13.6875	33.1169	2.4375	15.5844	15.4375	5.67376	8.76562	3283771	270	733	0
Sichuan	Chengdu	92	0.654915	61.0063	149.875	55.3459	41.5584	59.0909	21.6875	70.7792	3.3125	35.0649	18.8125	16.3121	8.96094	14047625	916	977	1
Sichuan	Dazhou	17	0.310895	20.1258	125.25	33.3333	56.4935	44.1558	15.5	44.1558	6.1875	68.1818	24.3125	48.9362	0.557292	5468092	330	650	0
Sichuan	Deyang	12	0.331881	22.0126	152.812	61.0063	31.8182	68.8312	22.375	74.026	2.25	13.6364	24.375	49.6454	8.76562	3615759	620	946	0
Sichuan	Guang'an	24	0.748719	66.6667	121.25	31.4465	50.6494	50	14.0625	36.3636	2.5	16.2338	17.8125	11.3475	8.76562	3205476	510	736	0
Sichuan	Luzhou	10	0.237055	10.6918	152.125	59.7484	44.8052	55.8442	19.25	57.7922	4.5625	54.5455	21.0625	26.9504	8.76562	4218426	340	874	0
Sichuan	Mianyang	17	0.368455	26.4151	151.375	58.4906	32.4675	68.1818	20.8125	67.5325	3.375	36.3636	25.75	60.2837	8.96094	4613862	230	912	0
Sichuan	Nanchong	28	0.445958	36.478	145.188	48.4277	59.0909	40.9091	10.4375	15.5844	1.9375	7.14286	22.5	36.1702	8.76562	6278622	500	783	0
Sichuan	Neijiang	15	0.405094	31.4465	146.062	49.6855	52.5974	48.0519	12.375	24.6753	3.1875	31.1688	23.8125	44.6809	8.76562	3702847	690	893	0
Sichuan	Panzhihua	11	0.906005	74.2138	133.688	40.8805	68.1818	32.4675	25.375	82.4675	15.6875	94.8052	25.6875	59.5745	10.7005	1214121	160	1304	0
Tianjin	Tianjin	63	0.403298	30.8176	152.25	60.3774	35.7143	64.9351	27.5625	88.961	4.75	57.1429	18.875	17.0213	-1.21382	15621200	1300	989	2
Xinjiang	Urumqi	12	0.385817	28.9308	214.625	94.9686	11.6883	88.961	37.0625	100	2.25	13.6364	12.25	2.12766	-12.8331	3110280	244	2768	0
Yunnan	Kunming	35	0.544137	47.1698	58.25	1.88679	88.961	11.6883	15.3125	42.8571	5.25	59.0909	29.375	75.1773	10.7005	6432209	320	1293	1
Yunnan	Qu Jing	10	0.170793	3.14465	71.3125	3.14465	93.5065	7.14286	8.1875	11.039	4.375	51.9481	35.3125	90.0709	10.7005	5855055	200	1175	1
Yunnan	Xishuangbanna	15	1.32332	88.0503	120.625	29.5597	94.8052	5.84416	10.75	17.5325	2.08333	11.039	35.1875	88.6525	10.7005	1133515	58	1648	0
Yunnan	Yuxi	12	0.520942	43.3962	57	1.25786	100	0.649351	5.875	5.19481	2.6875	18.1818	33	85.1064	10.7005	2303518	170	1348	0
Yunnan	Zhaotong	10	0.191809	4.40252	74.375	3.77358	83.1169	17.5325	7.0625	7.14286	3.625	42.8571	28.125	71.6312	10.7005	5213521	240	1090	0
Zhejiang	Hangzhou	141	1.62062	91.8239	130	37.1069	53.8961	46.7532	22.6875	74.6753	3.93333	48.0519	13.1333	3.5461	6.59713	8700373	620	567	2
Zhejiang	Jiaxing	27	0.599779	54.0881	129.25	35.8491	64.9351	35.7143	18.5	55.1948	4.375	51.9481	18.2308	12.766	6.71186	4501657	1100	621	1
Zhejiang	Jinhua	44	0.820655	69.8113	102	19.4969	81.8182	18.8312	16.5625	48.7013	3.1875	31.1688	15	4.96454	6.59713	5361572	490	545	1
Zhejiang	Lishui	16	0.755802	67.2956	171.688	69.8113	89.6104	10.3896	11.0625	19.4805	2	7.79221	21.7692	31.9149	6.59713	2116957	140	596	0
Zhejiang	Ningbo	120	1.57777	91.195	113.154	25.7862	72.0779	28.5714	14.7692	41.5584	3.30769	34.4156	23.9231	45.3901	7.1224	7605689	840	705	1
Zhejiang	Shaoxing	30	0.610719	55.3459	122.375	32.0755	79.8701	20.7792	16	47.4026	1.66667	4.54545	13.9231	4.25532	6.5867	4912239	590	609	0
Zhejiang	Taizhou	122	2.04395	94.9686	94.2308	10.0629	64.2857	36.3636	13	29.2208	2.1875	12.3377	19.6923	23.4043	7.1224	5968838	607	723	1
Zhejiang	Wenzhou	364	3.99031	98.7421	99.875	15.7233	95.4545	5.19481	7.07692	7.79221	1.61538	3.8961	24.4615	51.773	7.1224	9122102	648	685	1
